# Supplementary material for: Two Signs of Superfluid Liquid in a Suspension of CdSe/ZnS Quantum Dots at Room Temperature
Source: Hindawi journal article supplement (doi:10.1155/2019/4638148), 2019-03-04
Supplement: f1 [file 4638148.f1.zip]

Archive with 3 entries (2 files):
- 4638148.f1/
- 4638148.f1/vidio 1.gif
- 4638148.f1/vidio 2.gif
